# Supplementary material for: Predicting Outcomes of Language Rehabilitation: Prognostic Factors for Immediate and Long-Term Outcomes After Aphasia Therapy
Source: PubMed Central journal article supplement (PMC10205105; doi:10.1044/2022_jslhr-22-00347), 2023-02-24
Supplement: JSLHR-66-1068-s001.pdf [file JSLHR-66-1068-s001.pdf]

| <b>Assessment</b>            | <b><i>n</i></b> | <b>Mean</b> | <b><i>SD</i></b> |
|------------------------------|-----------------|-------------|------------------|
| <b>WAB</b>                   |                 |             |                  |
| <i>Aphasia Quotient</i>      | 102             | 60.0        | 22.7             |
| <i>Spontaneous Speech</i>    | 102             | 11.5        | 4.8              |
| <i>Auditory Comp.</i>        | 102             | 7.7         | 1.8              |
| <i>Repetition</i>            | 102             | 5.2         | 2.9              |
| <i>Naming</i>                | 102             | 5.5         | 3.0              |
| ASRS Apraxia of Speech score | 101             | 1.6         | 1.6              |
| WAIS                         | 102             | 12.0        | 5.7              |
| PPTT                         | 102             | 45.3        | 5.6              |
| KDT                          | 102             | 45.9        | 5.6              |
| PRT                          | 101             | 110.0       | 55.6             |
| Naming 40                    | 85              | 16.5        | 13.3             |
| <b>NAVS subscores</b>        |                 |             |                  |
| <i>VNT</i>                   | 99              | 10.3        | 7.4              |
| <i>VCT</i>                   | 102             | 19.1        | 4.3              |
| <i>Argument Structure</i>    | 97              | 16.9        | 12.8             |
| <i>ASPT</i>                  | 96              | 16.4        | 12.8             |
| <i>SPPT</i>                  | 96              | 9.6         | 10.7             |
| <i>SCT</i>                   | 102             | 21.8        | 5.8              |
| <b>TALSA</b>                 |                 |             |                  |
| <i>W5SF</i>                  | 90              | 13.1        | 3.1              |
| <i>W5SU</i>                  | 90              | 14.9        | 3.4              |
| <i>NW5SF</i>                 | 89              | 13.6        | 2.9              |
| <i>NW5SU</i>                 | 89              | 14.3        | 3.3              |
| <i>Triplet 1</i>             | 90              | 9.7         | 3.2              |
| <i>Triplet 2</i>             | 90              | 9.3         | 3.2              |
| <b>PALPA</b>                 |                 |             |                  |
| <i>PALPA 1</i>               | 90              | 58.0        | 9.4              |
| <i>PALPA 2</i>               | 90              | 59.9        | 9.5              |
| <i>PALPA 8</i>               | 90              | 7.7         | 7.2              |
| <i>PALPA 14</i>              | 90              | 9.8         | 4.0              |
| <i>PALPA 15</i>              | 90              | 47.6        | 8.1              |
| <i>PALPA 16 ISW</i>          | 87              | 18.3        | 6.9              |
| <i>PALPA 16 ISNW</i>         | 87              | 8.0         | 3.6              |
| <i>PALPA 17 FSW</i>          | 86              | 13.3        | 7.1              |
| <i>PALPA 17 FSNW</i>         | 86              | 6.7         | 4.0              |
| <b>Discourse</b>             |                 |             |                  |
| <i>Mean CWPM</i>             | 98              | 47.0        | 33.3             |
| <i>Mean PD</i>               | 98              | .4          | .1               |
| <i>Mean VPU</i>              | 98              | .8          | .5               |

**Supplemental Material S1.** Participants' cognitive-linguistic test scores. WAB = Western Aphasia Battery; ASRS = Apraxia of Speech Rating Scale; WAIS = Wechsler Adult Intelligence Scale; PPTT = Pyramids and Palm Trees Test; KDT = Kissing and Dancing Test; PRT = Philadelphia Repetition Test; NAVS = Northwestern Assessment of Verbs in Sentences; TALSA = Temple Assessment of Language and Short-term Memory in Aphasia; PALPA = Psycholinguistic Assessment of Language Processing in Aphasia.
